# Supplementary material for: Carbons derived from resole-type phenolic resins for use in lithium–sulfur batteries: templating the resins with sulfur leads to enhanced cell performance
Source: Royal Society of Chemistry journal article supplement (doi:10.1039/d3ya00481c), 2024-01-01
Supplement: d3ya00481c1.pdf [file d3ya00481c1.pdf]

## Supporting Information

### **Carbons derived from resole-type phenolic resins for use in Lithium-Sulfur batteries: Templating the resins with Sulfur leads to substantially enhanced cell performance**

Luke D. J. Barter<sup>a</sup>, Irshad Mohammad<sup>a</sup>, Steven J. Hinder<sup>b</sup>, John F. Watts<sup>b</sup>, Robert C. T. Slade<sup>a</sup> and Carol Crean<sup>a\*</sup>

<sup>a</sup> Chemistry, School of Chemistry and Chemical Engineering, University of Surrey, Guilford GU2 7XH, United Kingdom

<sup>b</sup> School of Mechanical Engineering, University of Surrey, Guilford GU2 7XH, United Kingdom

\* [c.crean@surrey.ac.uk](mailto:c.crean@surrey.ac.uk)

a)

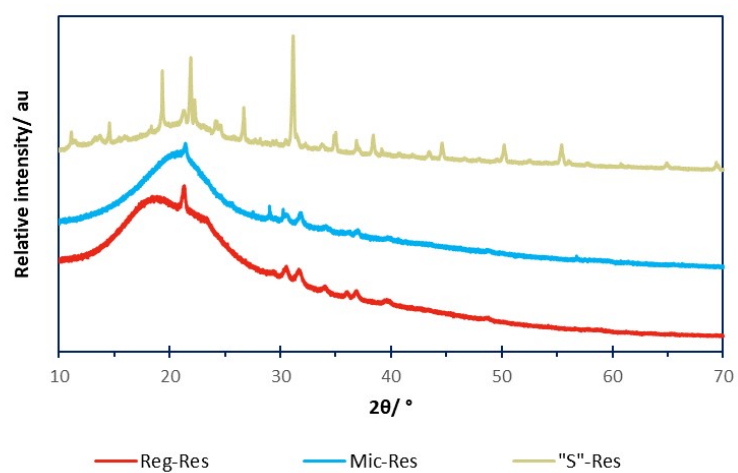

b)

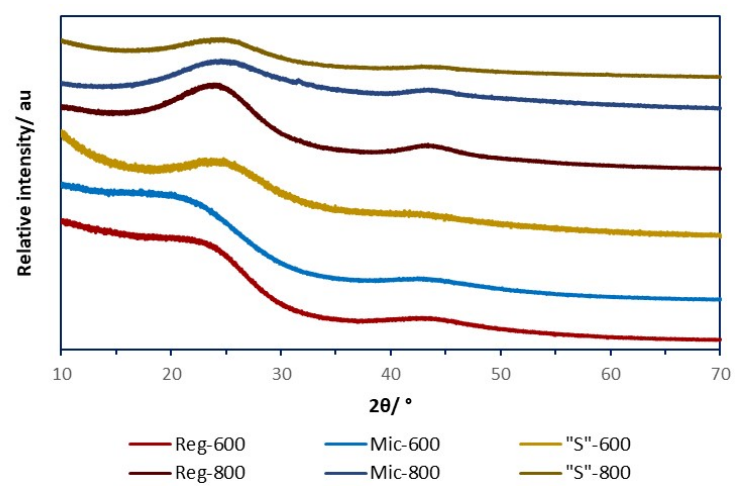

**Fig. S1** XRD profiles for (a) the resole resins and (b) the various derived carbons.

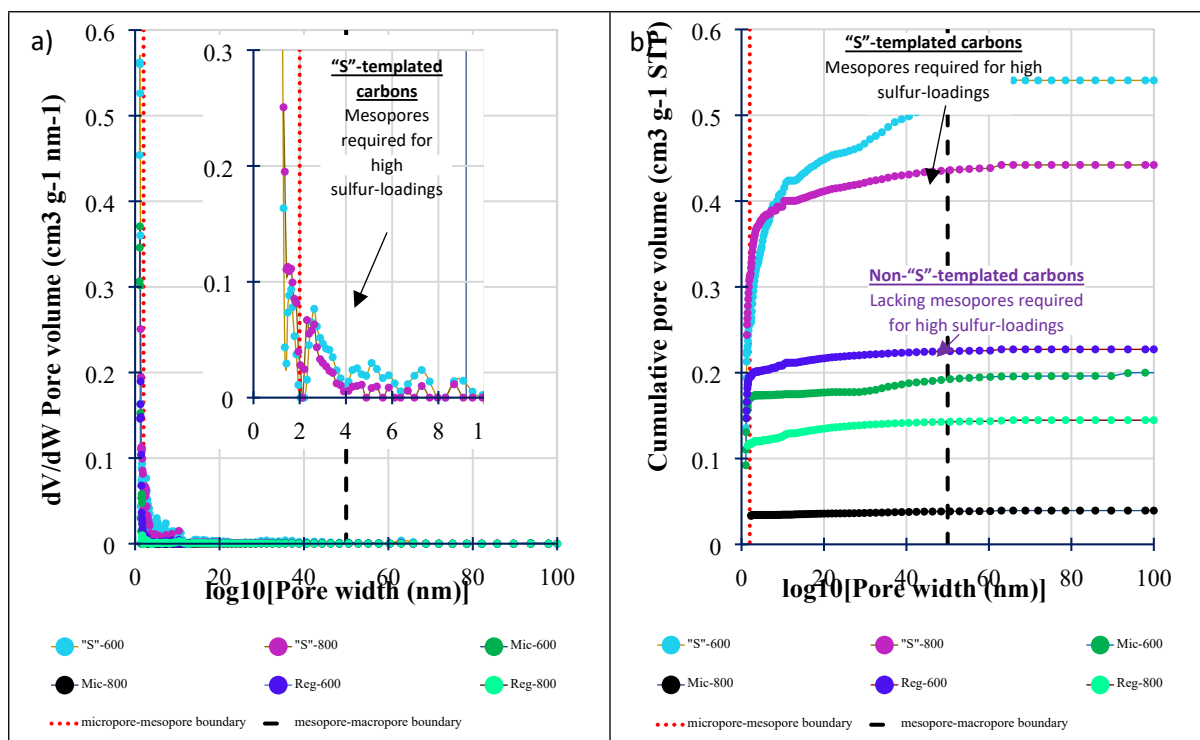

**Fig. S2** The non-localised density functional theory pore modelled data of carbons with slit-shaped pores. The pore size distributions (a) and cumulative pore volume plots (b) were based on the sorption data presented in Fig. 2.

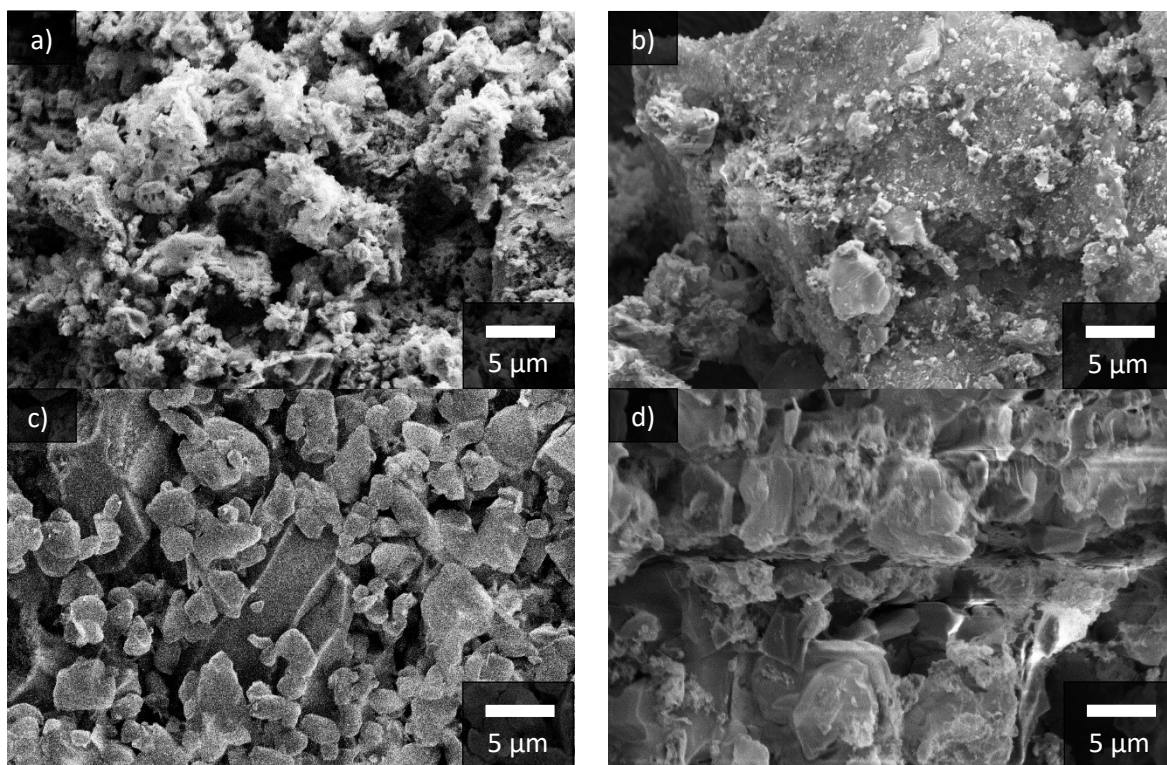

**Fig. S3** Scanning electron micrographs of carbon/sulfur composites made with S"-600, by either deposit (a) or melt-loading (b) with elemental sulfur, or Reg-600, by either deposition-loading (c) or melt-loading (d) with elemental sulfur.

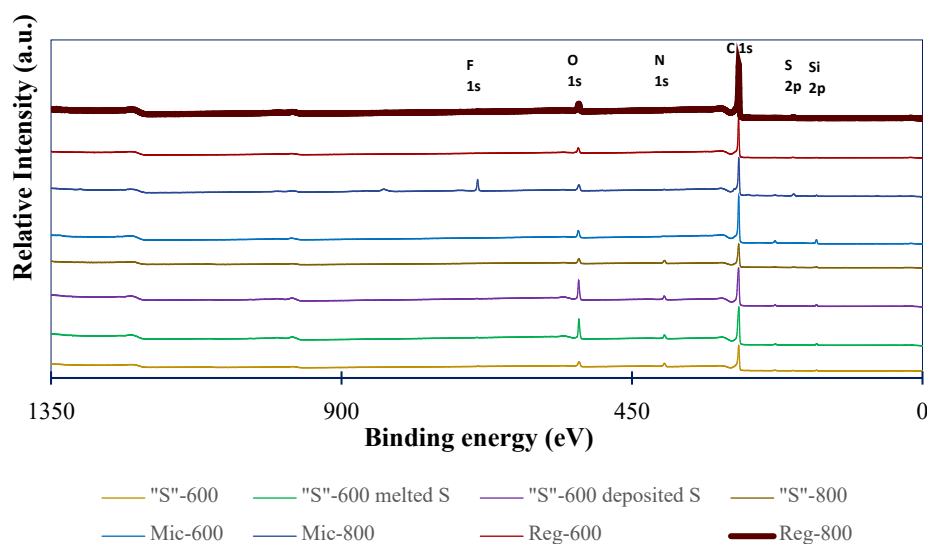

**Fig. S4** The XPS spectra of the carbons and carbon/sulfur composites of "S"-600

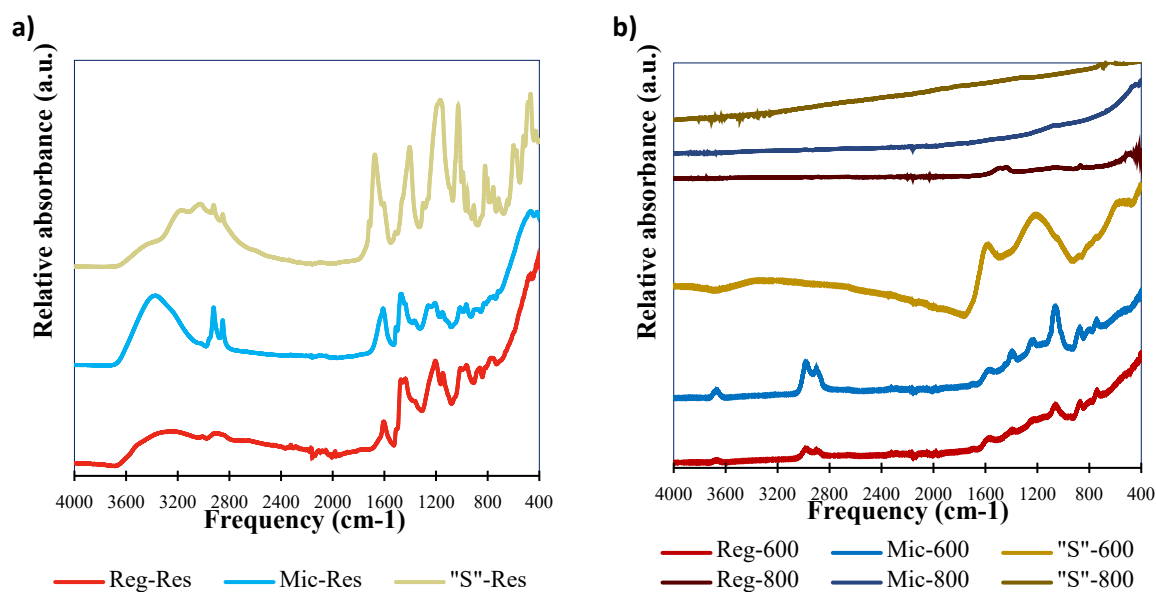

**Fig. S5** The UATR-FTIR spectra of the unpyrolysed resoles (a) and XRD profiles for the various derived carbons (b).

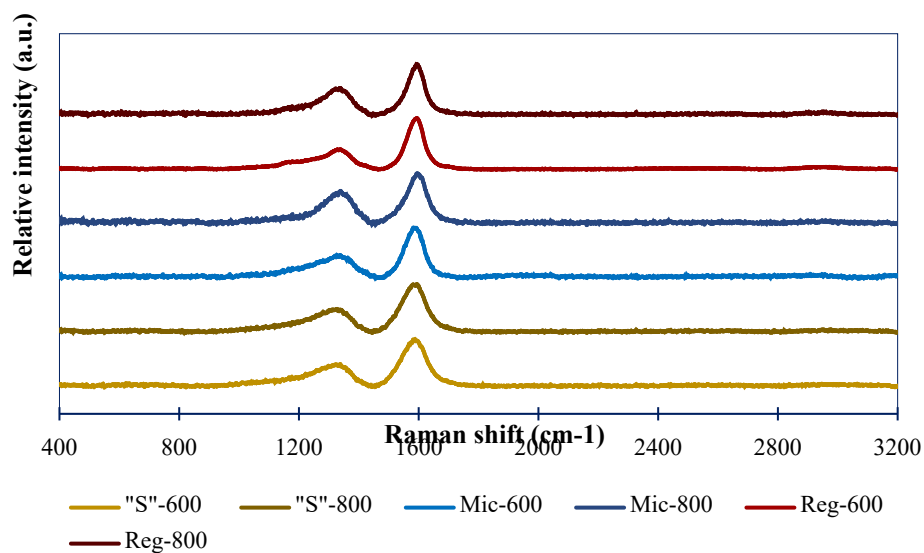

**Fig. S6** The Raman spectra of the resole-derived carbons.

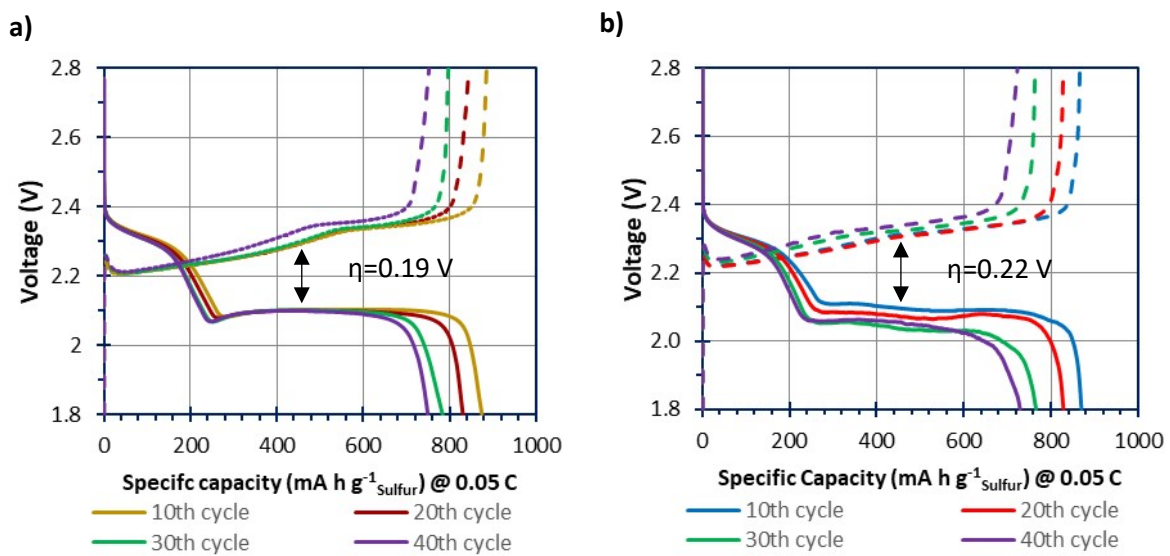

**Fig. S7** Discharge and charge profiles at ten cycle intervals for cells made with deposition-loaded "S"-600 (a) and Mic-600 (b). The test involved 40 cycles at 0.05 C.

**Table S1** Component values for the model equivalent circuits used in fitting the impedance data for cells with deposition-loaded “S”-600 and Mic-600. Cells were rested at OCV for > 2h both before and after 40 cycles at 0.05 C.

|                                                          | “S”-600<br>before cycling                   | “S”-600<br>after cycling                    | Mic-600<br>before cycling                   | Mic-600<br>after cycling                    |
|----------------------------------------------------------|---------------------------------------------|---------------------------------------------|---------------------------------------------|---------------------------------------------|
| $R_s$ (Ohm)                                              | 1.5                                         | 2.0                                         | 3.0                                         | 6.5                                         |
| $R_{Cpbc}$ (Ohm)                                         | 4.5                                         | -                                           | 5.0                                         | -                                           |
| $CPE_{Cpbc}$ ( $F s^{[\alpha-1]}$ )                      | $6.0 \times 10^{-8}$<br>[ $\alpha = 0.85$ ] | -                                           | $4.0 \times 10^{-7}$<br>[ $\alpha = 0.80$ ] | -                                           |
| $R_{SEI}$ (Ohm)                                          | -                                           | 11.0                                        | -                                           | 6.5                                         |
| $CPE_{SEI}$ ( $F s^{[\alpha-1]}$ )                       | -                                           | $5.0 \times 10^{-9}$<br>[ $\alpha = 0.60$ ] | -                                           | $1.8 \times 10^{-7}$<br>[ $\alpha = 0.75$ ] |
| $R_{CT}$ (Ohm)                                           | 34.0                                        | 4.0                                         | 169.0                                       | 15.0                                        |
| $CPE_{CT}$ ( $F s^{[\alpha-1]}$ )                        | $8.0 \times 10^{-7}$<br>[ $\alpha = 0.82$ ] | $1.0 \times 10^{-5}$<br>[ $\alpha = 0.80$ ] | $5.0 \times 10^{-7}$<br>[ $\alpha = 0.82$ ] | $4.5 \times 10^{-6}$<br>[ $\alpha = 0.80$ ] |
| $R_{Film}$ (Ohm)                                         | 4.0                                         |                                             |                                             | 2.0                                         |
| $CPE_{Film}$ ( $F s^{[\alpha-1]}$ )                      | $2.0 \times 10^{-4}$<br>[ $\alpha = 0.60$ ] |                                             |                                             | $6.0 \times 10^{-4}$<br>[ $\alpha = 0.80$ ] |
| $R_{Polysulfide\ solid/liquid}$ (Ohm)                    |                                             |                                             |                                             | 3.0                                         |
| $CPE_{Polysulfide\ solid/liquid}$ ( $F s^{[\alpha-1]}$ ) |                                             |                                             |                                             | $3.0 \times 10^{-3}$<br>[ $\alpha = 0.50$ ] |
| $W_s$ (Ohm $s^{-0.5}$ )                                  | 2.6                                         | 1.0                                         | 5.8                                         | 0.9                                         |

|             |     |           |                                        |
|-------------|-----|-----------|----------------------------------------|
| $R_s$       |     |           | Series resistance                      |
| R           | CPE | $C_{pbc}$ | Carbon host positive bulk contribution |
| R           | CPE | SEI       | Solid-electrolyte interface            |
| R           | CPE | CT        | Charge transfer                        |
| R           | CPE | Film      | $Li_2S/Li_2S_2$ film formation         |
| $W_s$       |     |           | Warburg element                        |
| $CPE_{low}$ |     |           | Low frequency CPE                      |
| frequency   |     |           |                                        |
